# Supplementary material
Source: PubMed Central journal article supplement (PMC8409432)
Supplement: NIHMS1734158-supplement-supplement.pdf [file NIHMS1734158-supplement-supplement.pdf]

## Supporting Information

### Mechanism of single-stranded DNA activation of recombinase intein splicing

Christopher W. Lennon, Matthew J. Stanger, and Marlene Belfort\*

Department of Biological Sciences and RNA Institute, University at Albany, Albany, New York, USA<sup>†</sup>; Department of Biomedical Sciences, School of Public Health, University at Albany, Albany, New York, USA<sup>‡</sup>;

\*Correspondence to [mbelfort@albany.edu](mailto:mbelfort@albany.edu)

### Experimental Procedures

**Plasmid construction and mutagenesis:** pET47b-RadA ( $\Delta$ 1-115 codons) was subcloned from pET45b-RadA ( $\Delta$ 1-115 codons) (14) using BamHI/XhoI restriction sites, resulting in an in-frame N-terminal His-tag. *Pho* RadA N172A/T+1A (pET47b), C1A (pET45b) and C+1 (pET47b) were constructed using the Q5 site-directed mutagenesis kit (New England Biolabs). Primers IDT5967 (5'-TGTTCTCCATGCGGCGCAGCTAGCCC-3') and IDT5968 (5'-AGTCCATTGGGAGCTATG-3') were used to make N172A/T+1A, IDT5965 (5'-TAGTGGGAAGGCCTTTGCTAGGGATAC-3') and IDT5966 (5'-CCGAACTCCCCAAAGACT-3') were used to make C1A, and IDT5961 (5'-TCTCCATAATTGCCAGCTAGCCCATAC-3') and IDT5962 (5'-ACAAGTCCATTGGGAGCT-3') were used to make C+1.

**Protein expression and purification:** All proteins were expressed in *E. coli* BL21(DE3) (Novagen). Cells were grown at 37°C to an optical density of ~0.5 at 600 nm, the

temperature was reduced to 16°C, expression was induced by addition of 0.5 mM isopropyl β-D-1-thiogalactopyranoside, and the cells were grown an additional ~16 hours. Proteins were purified by immobilized metal affinity chromatography using Ni-NTA resin (Qiagen) as described previously (14). Due to remaining impurities following Ni-NTA affinity chromatography for RadA N172A/T+1A and C1A, these proteins were further purified by cleavage of the His-tag followed by a second round of negative Ni-NTA chromatography. HRV 3C protease (Pierce) was used for N172A/T+1A and Enterokinase (Abcam) was used for C1A.

**Splicing, cleavage and disulfide bonding assays:** Splicing assays using WT *Pho* RadA were performed as previously described (14), except that the final concentration of protein was 0.25 mg/mL. NTC, CTC, and disulfide bonding assays using *Pho* RadA mutants were also performed under these conditions, except that 20 mM DTT was present in NTC assays with RadA N172A/T+1A and 20 mM TCEP was used in disulfide bonding assays with RadA C+1, where indicated. Samples were separated by SDS-PAGE, which was non-reducing unless otherwise noted. Times and presence or absence of ssDNA (M13mp18; New England Biolabs) are indicated in the figures and legends. All assays were performed at 63°C unless otherwise noted. Splicing of WT RadA was calculated as  $[(LE/LE+P)_{Tx} - (LE/LE+P)_{T0}] / [1 - (LE/LE+P)_{T0}]$ . N-terminal cleavage was calculated as the level of I-C<sub>Tx</sub> – I-C<sub>T0</sub>, normalized to 1 where 1 is the maximum I-C detected. C-terminal cleavage was calculated as the level of C<sub>Tx</sub> – C<sub>T0</sub>, normalized to 1 where 1 is the maximum C detected. Disulfide bond formation was calculated as  $P_{oxidized} / (P_{oxidized} + P_{reduced})$ .
